# Supplementary material for: Fe3O4@SiO2–MoO3H nanoparticles: a magnetically recyclable nanocatalyst system for the synthesis of 1,8-dioxo-decahydroacridine derivatives
Source: Royal Society of Chemistry journal article supplement (doi:10.1039/c6ra25571j), 2017-01-01
Supplement: c6ra25571j1.pdf [file c6ra25571j1.pdf]

## Supplementary materials

### **Fe<sub>3</sub>O<sub>4</sub>@SiO<sub>2</sub>-MoO<sub>3</sub>H nanoparticles: a magnetically recyclable nanocatalyst system for the synthesis of 1,8-dioxo-decahydroacridine derivatives**

Mahtab Kiani<sup>a,\*</sup>, Mohammad Mohammadipour<sup>b</sup>

<sup>a</sup>*Young Researchers and Elite Club, Karaj Branch, Islamic Azad University, Karaj, Iran*

<sup>b</sup>*Department of Chemistry, Semnan University, Semnan 35131-19111, Iran*

#### **Abstract**

Molybdic acid-functionalized silica-coated nano-Fe<sub>3</sub>O<sub>4</sub> particles (Fe<sub>3</sub>O<sub>4</sub>@SiO<sub>2</sub>-MoO<sub>3</sub>H) have been prepared as a novel heterogeneous acid catalyst using a facile process. The material was subsequently identified as an efficient catalyst for the synthesis of 1,8-dioxo-decahydroacridine derivatives under solvent free conditions. The catalyst could be readily recovered using a simple external magnet and reused several times without any significant loss in activity. Short reaction time, excellent yields and simple work-up are the advantages of this procedure.

*Keywords:* Fe<sub>3</sub>O<sub>4</sub>@SiO<sub>2</sub>-MoO<sub>3</sub>H; Novel heterogeneous acid catalyst; 1,8-Dioxo-decahydroacridine; Solvent free conditions; Excellent yields

# Supplementary materials

## 9-phenyl-3,4,6,7,9,10-hexahydroacridine-1,8(2H,5H)-dione (7a)

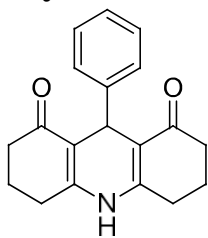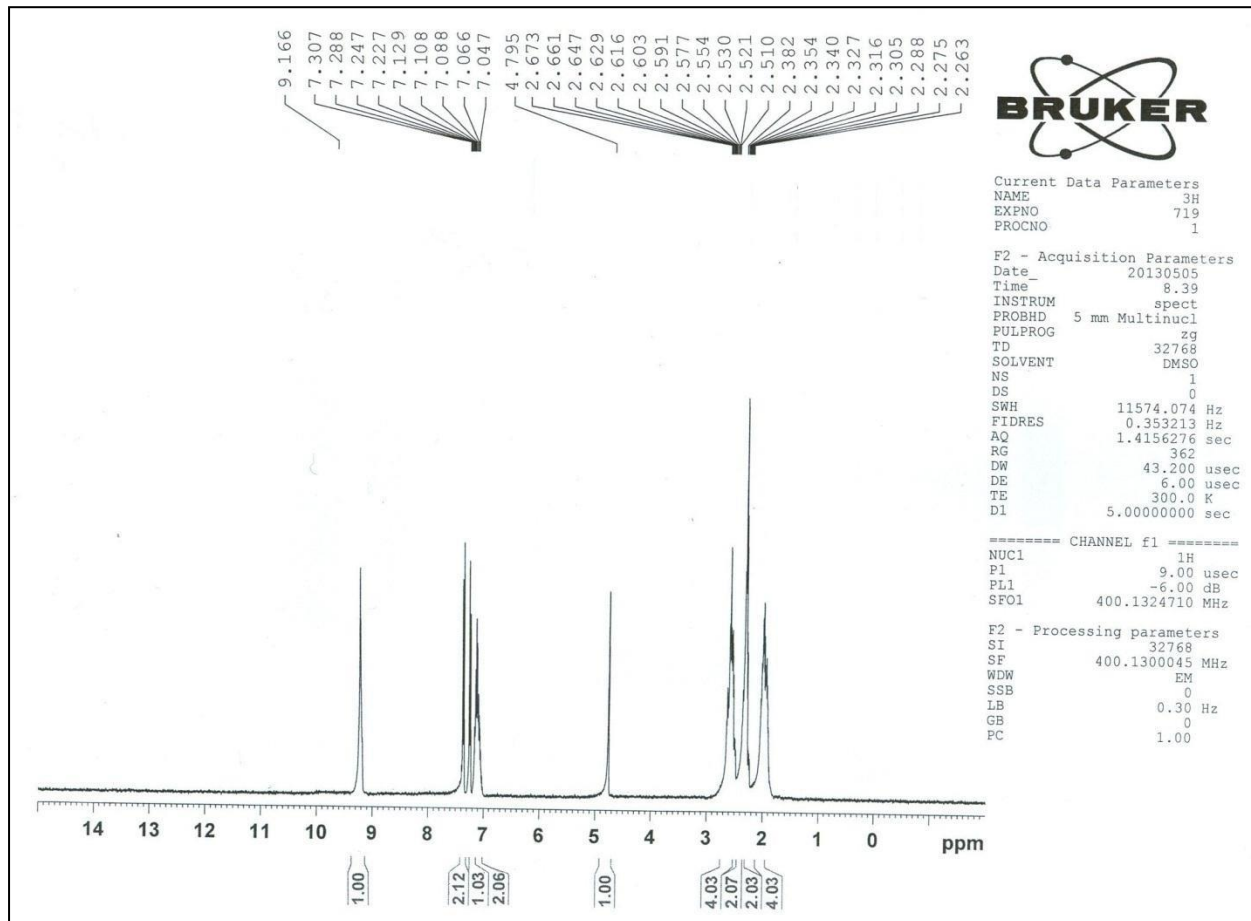

Fig. 1. <sup>1</sup>H NMR of (7a).

## Supplementary materials

### 9-(4-bromophenyl)-3,4,6,7,9,10-hexahydroacridine-1,8(2H,5H)-dione (7c)

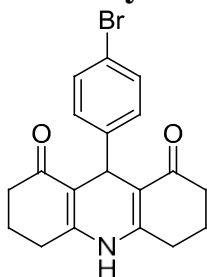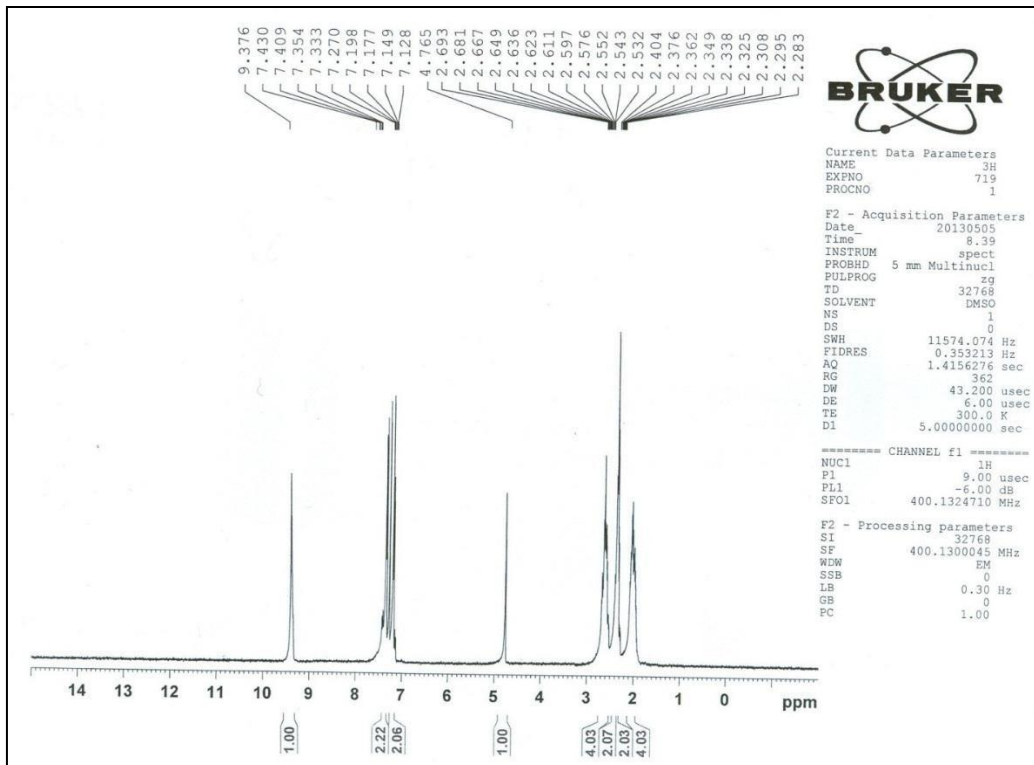

Fig. 2.  $^1\text{H}$  NMR of (7c).

# Supplementary materials

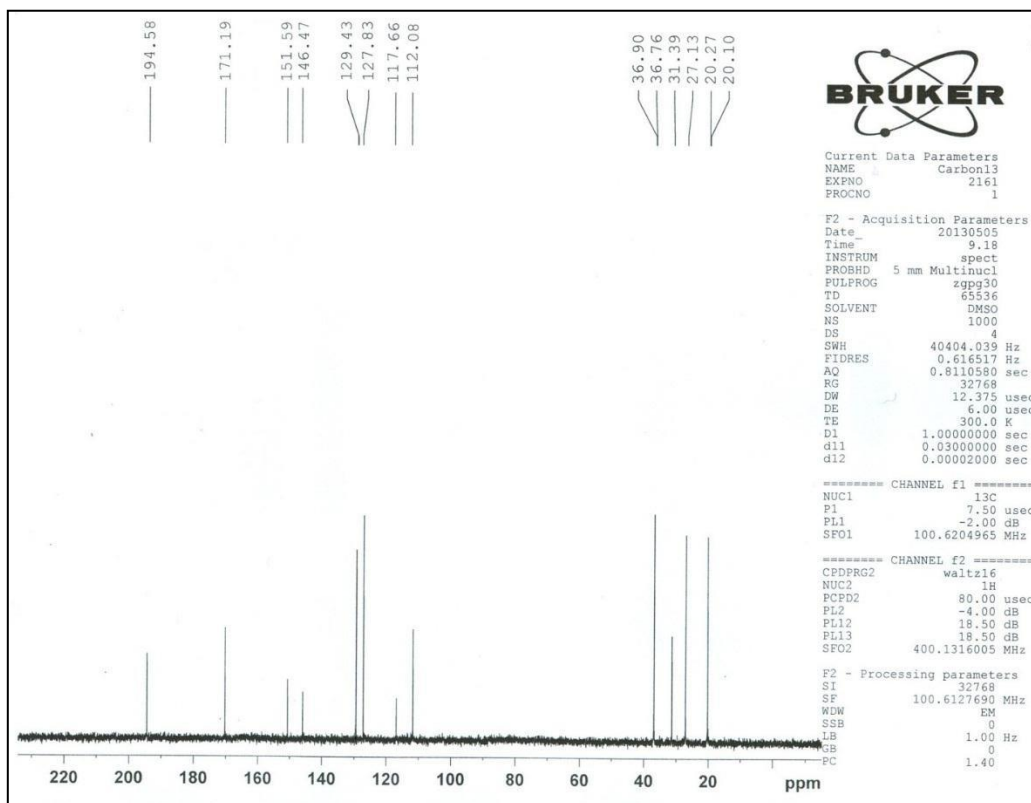

**Fig. 3.**  $^{13}\text{C}$  NMR of (7c).

# Supplementary materials

## 9-(p-tolyl)-3,4,6,7,9,10-hexahydroacridine-1,8(2H,5H)-dione (7d)

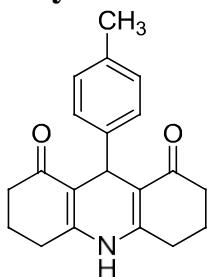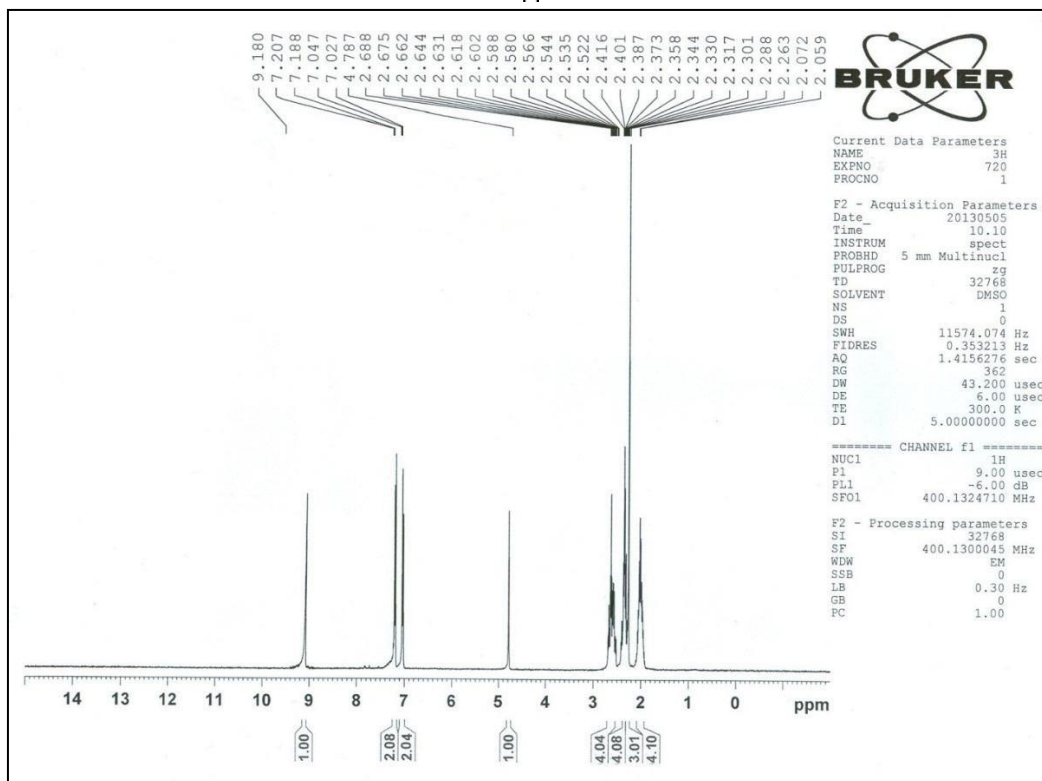

Fig. 4.  $^1\text{H}$  NMR of (7d).

# Supplementary materials

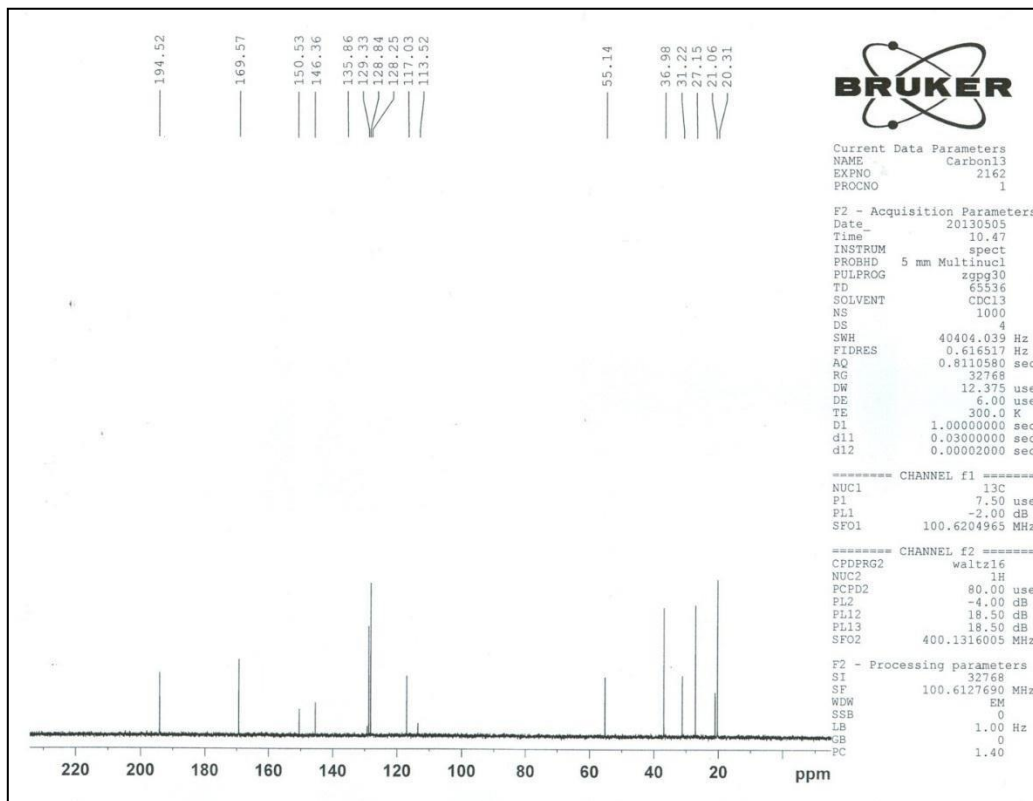

**Fig. 5.**  $^{13}\text{C}$  NMR of (7d).

# Supplementary materials

## 3,3,6,6-tetra methyl-9-phenyl-3,4,6,7,9,10-hexahydroacridine-1,8-(2H,5H)-dione (8a)

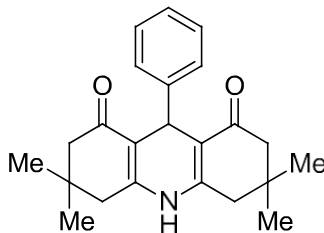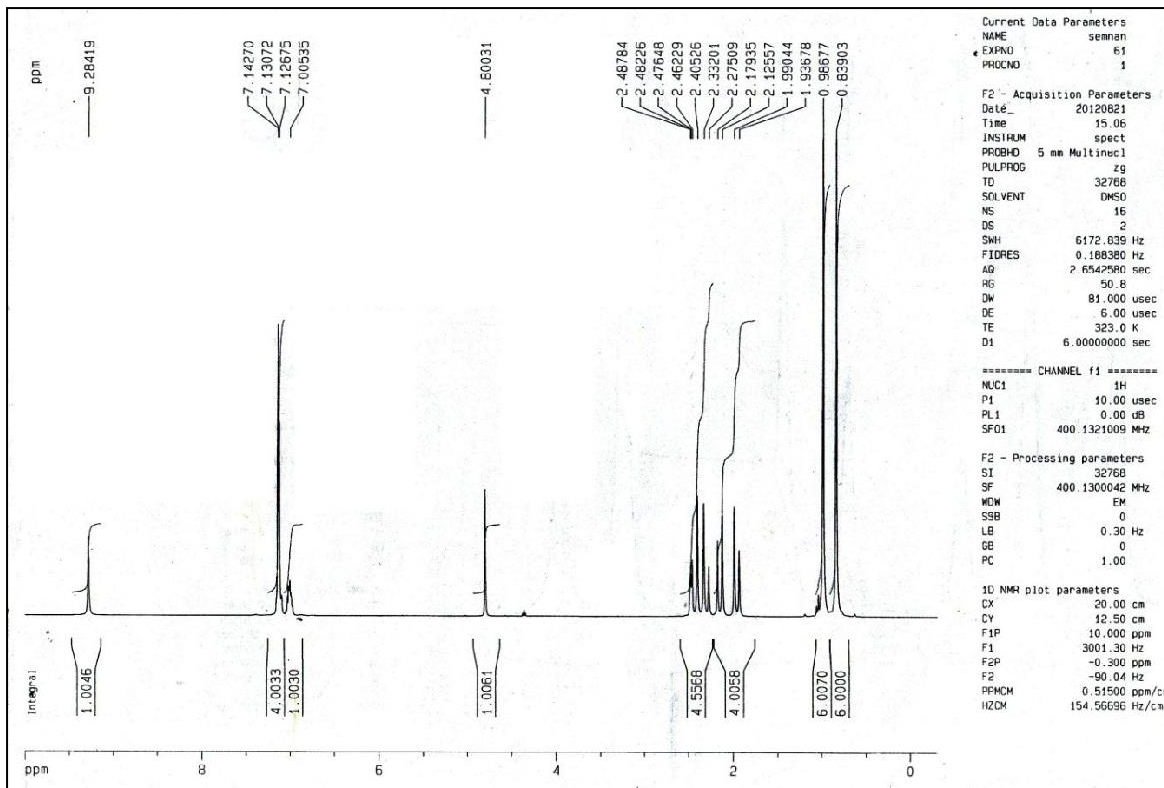

Fig. 6. <sup>1</sup>H NMR of (8a).

# Supplementary materials

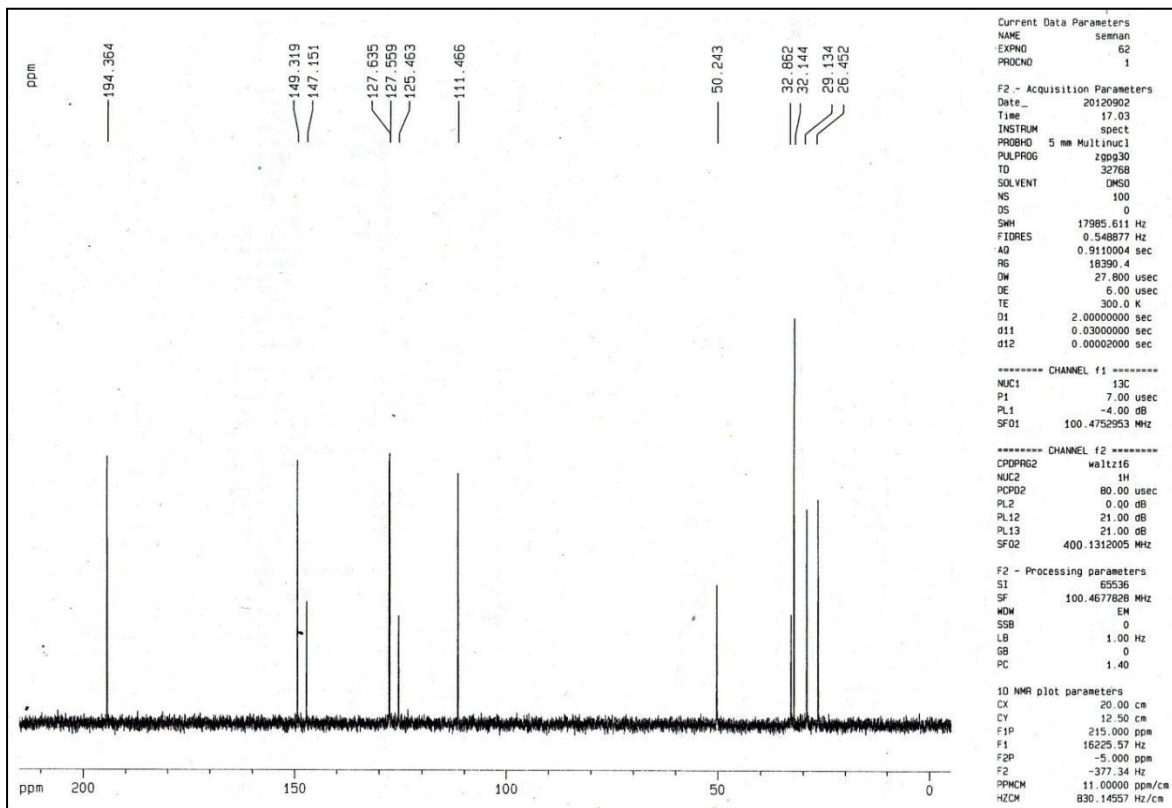

Fig. 7.  $^{13}\text{C}$  NMR of (8a).



## Supplementary materials

### 9-(4-methoxyphenyl)-3,3,6,6-tetramethyl-3,4,6,7,9,10-hexahydroacridine-1,8(2H,5H)-dione (8b)

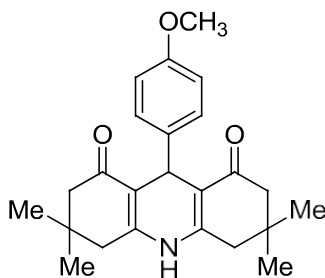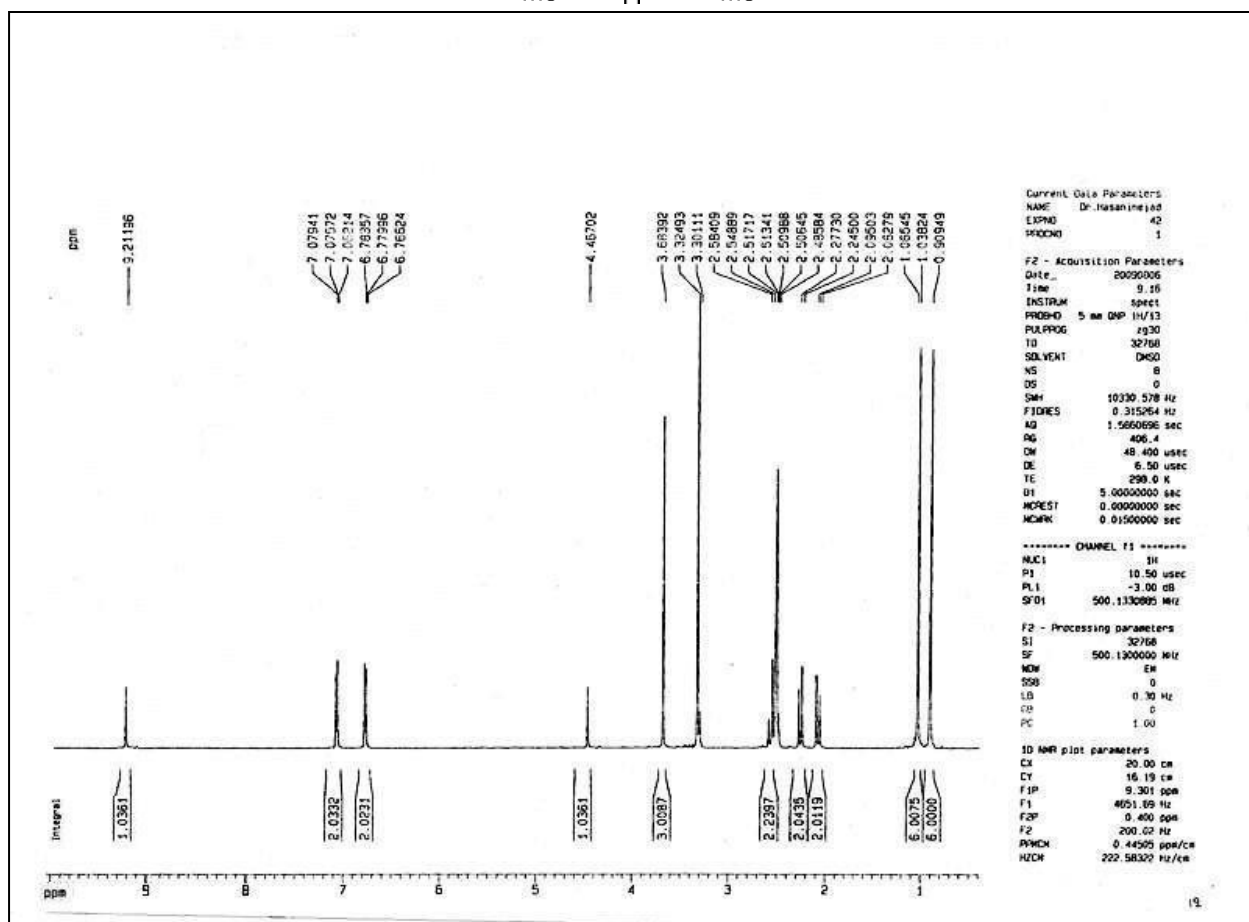

Fig. 8. <sup>1</sup>H NMR of (8b).

## Supplementary materials

### 9-(4-fluorophenyl)-3,3,6,6-tetramethyl-3,4,6,7,9,10-hexahydroacridine-1,8(2H,5H)-dione (8e)

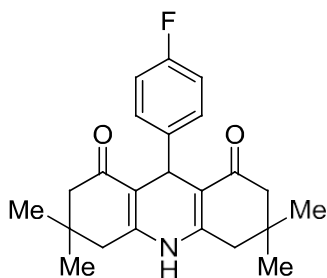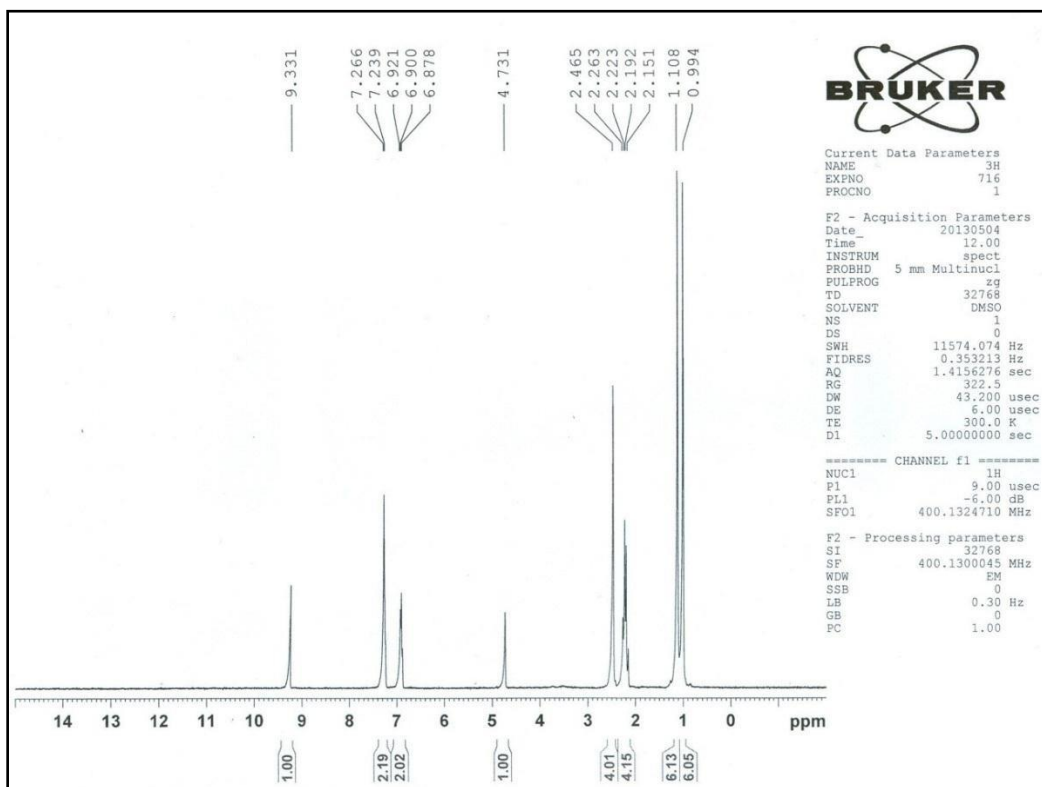

Fig. 9. <sup>1</sup>H NMR of (8e).

# Supplementary materials

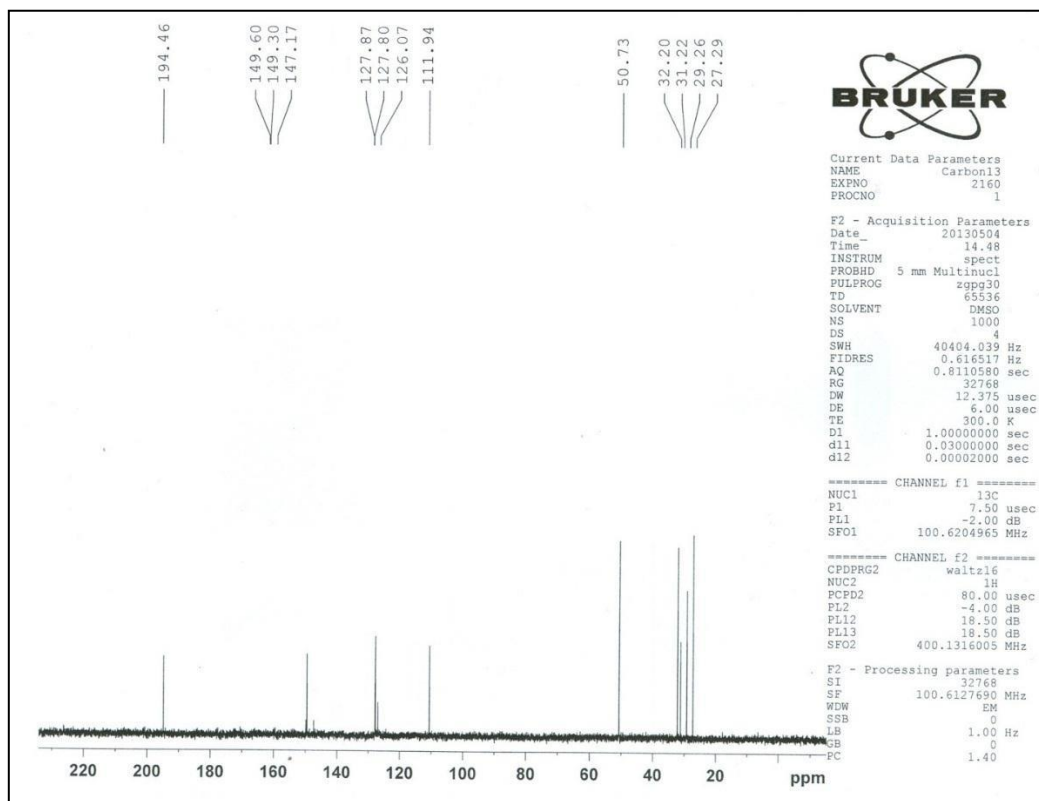

Fig. 10.  $^{13}\text{C}$  NMR of (8e).

## Supplementary materials

### 9-(4-chlorophenyl)-3,3,6,6-tetramethyl-3,4,6,7,9,10-hexahydroacridine-1,8(2H,5H)-dione (8f)

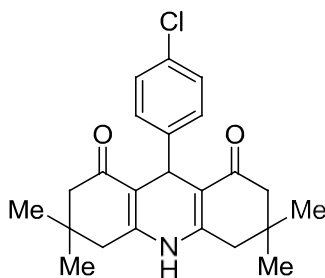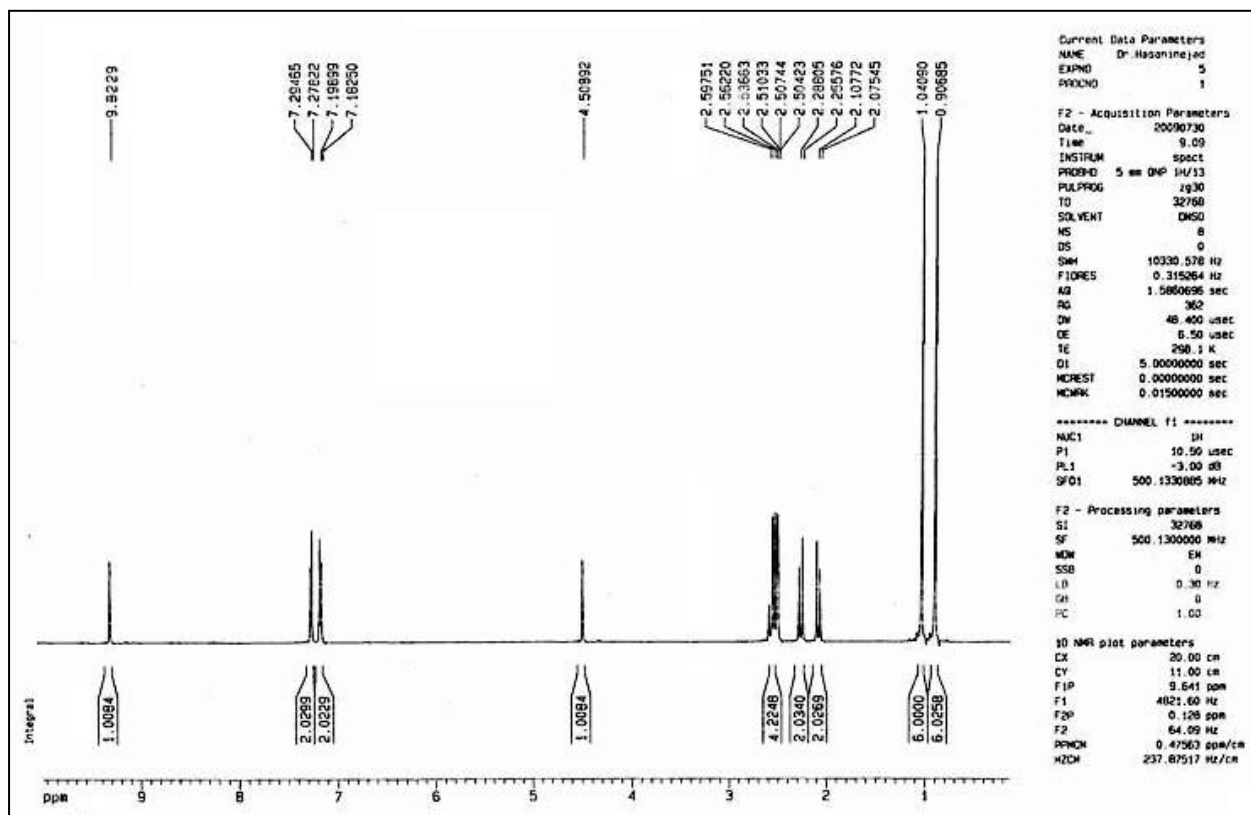

Fig. 11.  $^1\text{H}$  NMR of (8f).

## Supplementary materials

### 9-(4-bromophenyl)-3,3,6,6-tetramethyl-3,4,6,7,9,10-hexahydroacridine-1,8(2H,5H)-dione (8h)

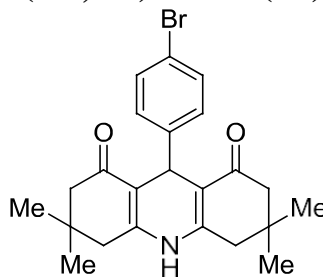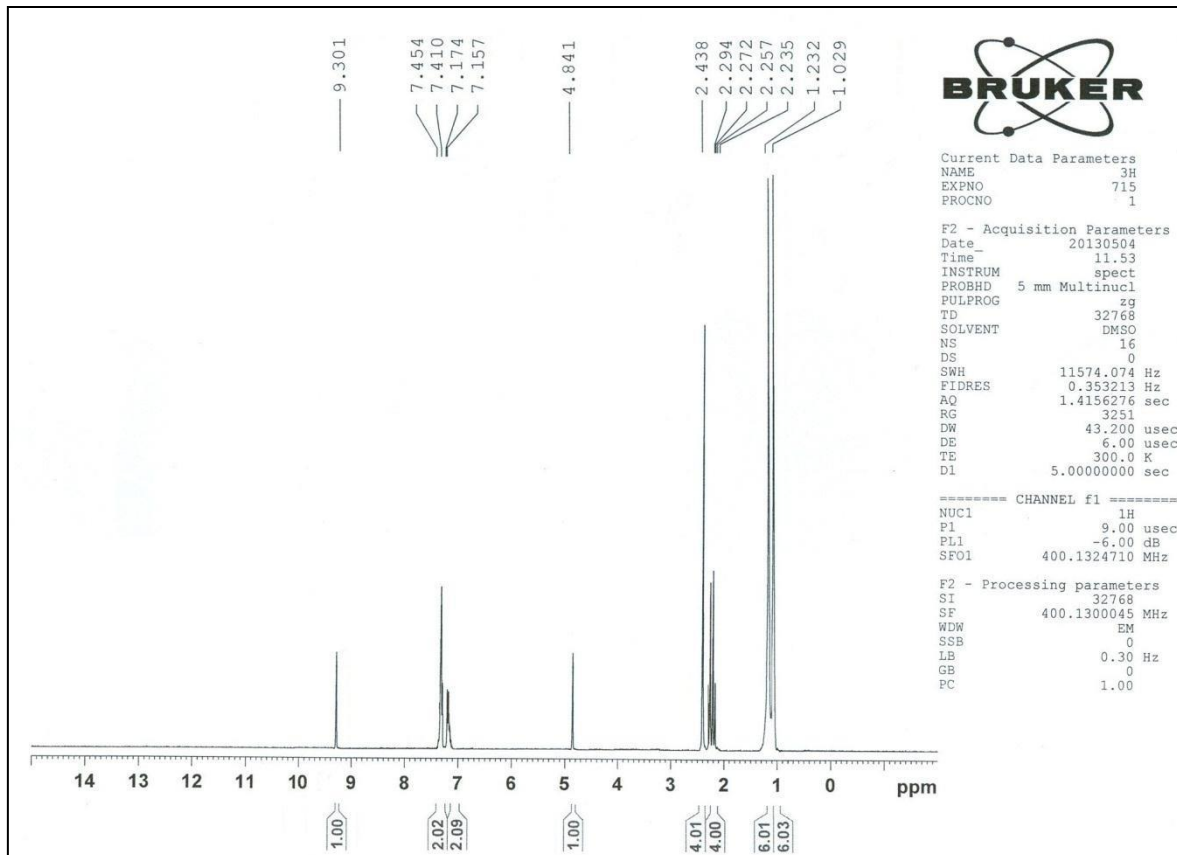

Fig. 12. <sup>1</sup>H NMR of (8h).

## Supplementary materials

### 3,3,6,6-tetramethyl-9-(4-nitrophenyl)-3,4,6,7,9,10-hexahydroacridine-1,8(2H,5H)-dione (8i)

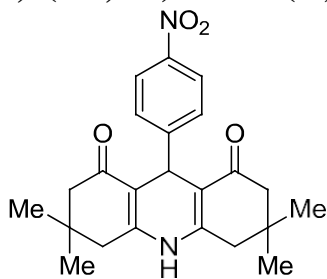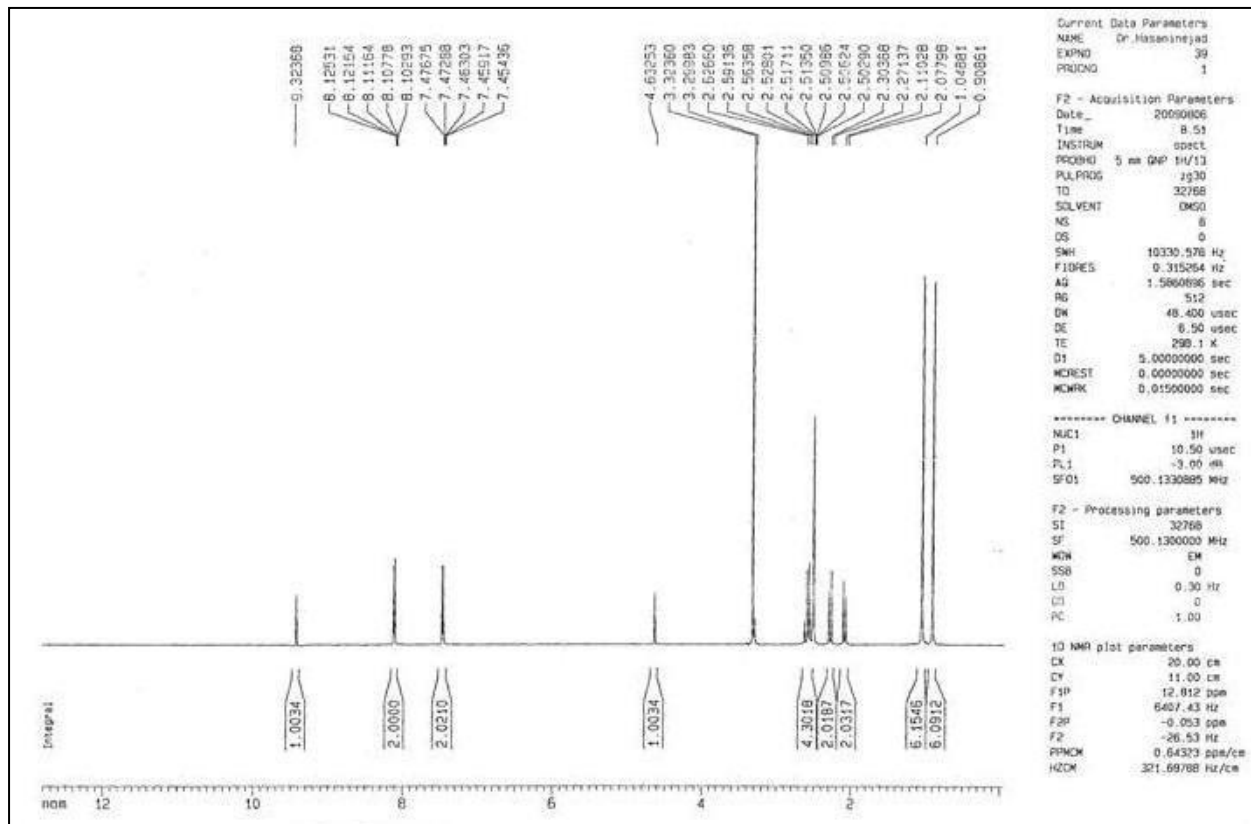

Fig. 13. <sup>1</sup>H NMR of (8i).

# Supplementary materials

## 3,3,6,6-tetramethyl-9-(3-nitrophenyl)-3,4,6,7,9,10-hexahydroacridine-1,8(2H,5H)-dione (8j)

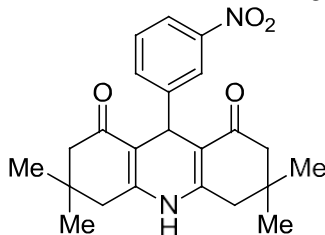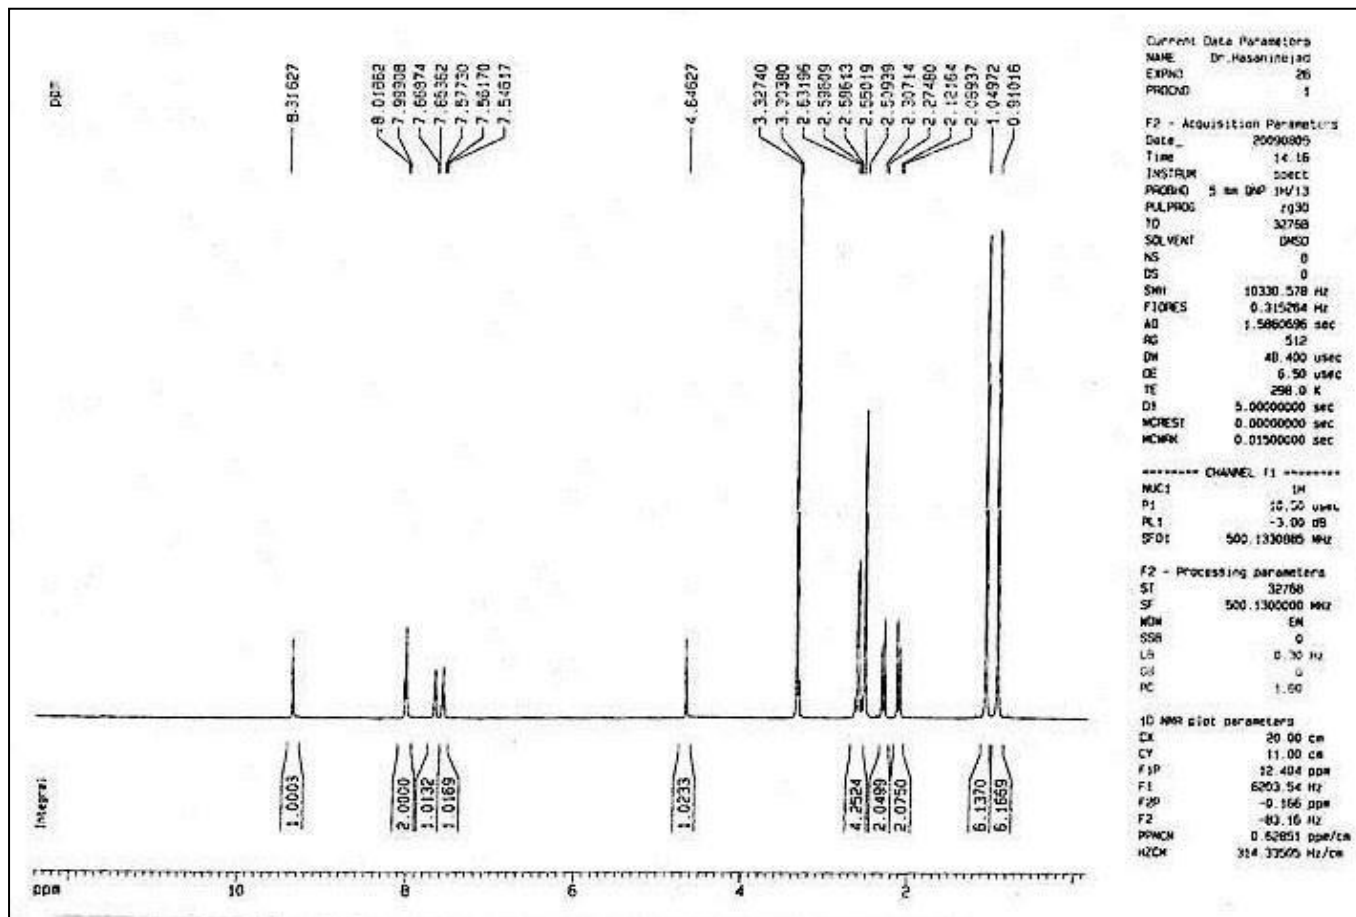

Fig. 14. <sup>1</sup>H NMR of (8j).

## Supplementary materials

### 3,3,6,6-tetramethyl-9-(naphthalen-2-yl)-3,4,6,7,9,10-hexahydroacridine-1,8(2H,5H)-dione (8k)

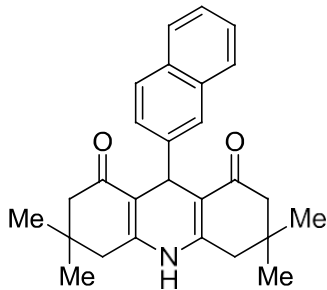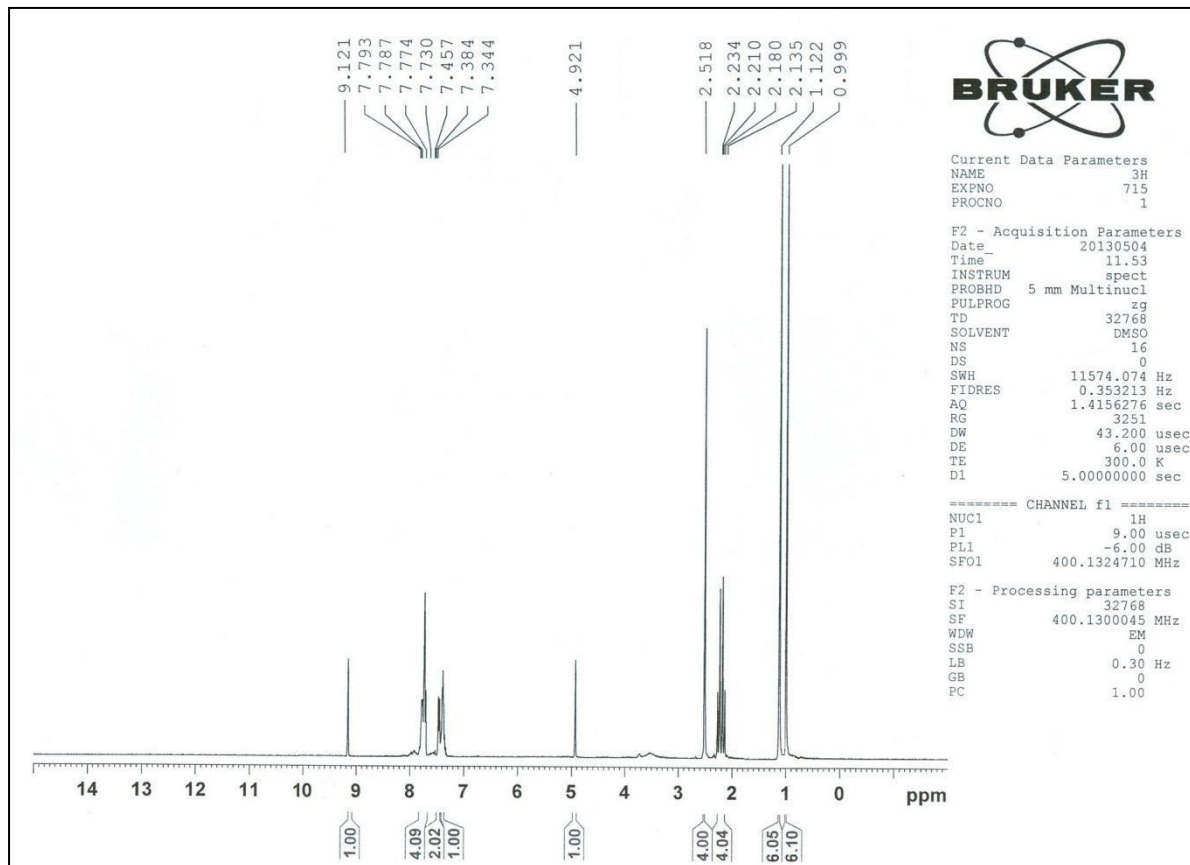

Fig. 15.  $^1\text{H}$  NMR of (8k).
